# Supplementary material for: Subgap states in aluminium- and hydrogen-doped zinc-oxide thin-film transistors
Source: Royal Society of Chemistry journal article supplement (doi:10.1039/d3tc00999h), 2023-01-01
Supplement: d3tc00999h1.pdf [file d3tc00999h1.pdf]

## Electronic Supplementary Information (ESI) for Subgap States in Aluminum- and Hydrogen- Doped Zinc-Oxide Thin-Film Transistors

Minho Yoon,\* Dongho Hyun, and Heung-Sik Kim\*

Department of Physics and Institute of Quantum Convergence Technology, Kangwon  
National University, Chuncheon, 24341, South Korea

**KEYWORDS:** subgap states, atomic layer deposition, zinc oxide transistors, doping, field-effect transistor

**Corresponding Author:** \*E-mail: minhoyoon78@gmail.com, heungsikim@kangwon.ac.kr

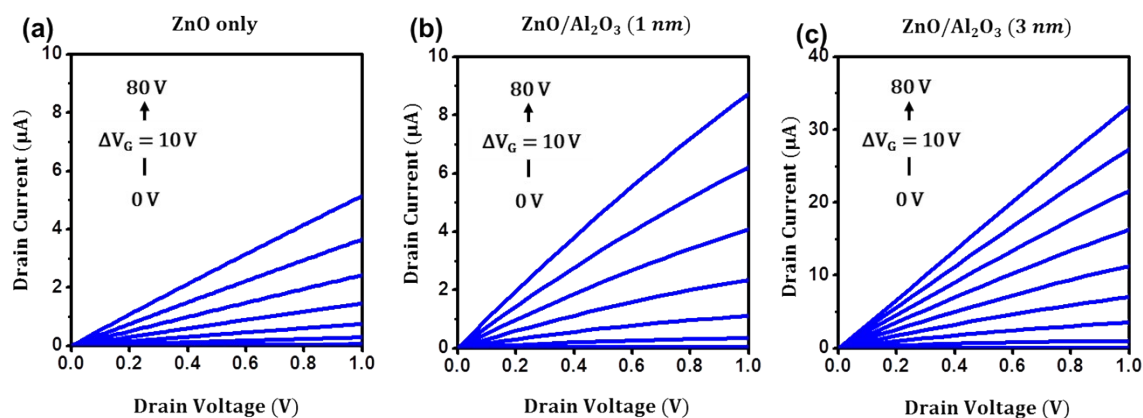

**Figure. S1.** (a-c) Output characteristics of ZnO TFTs with and without the top Al<sub>2</sub>O<sub>3</sub> layer..

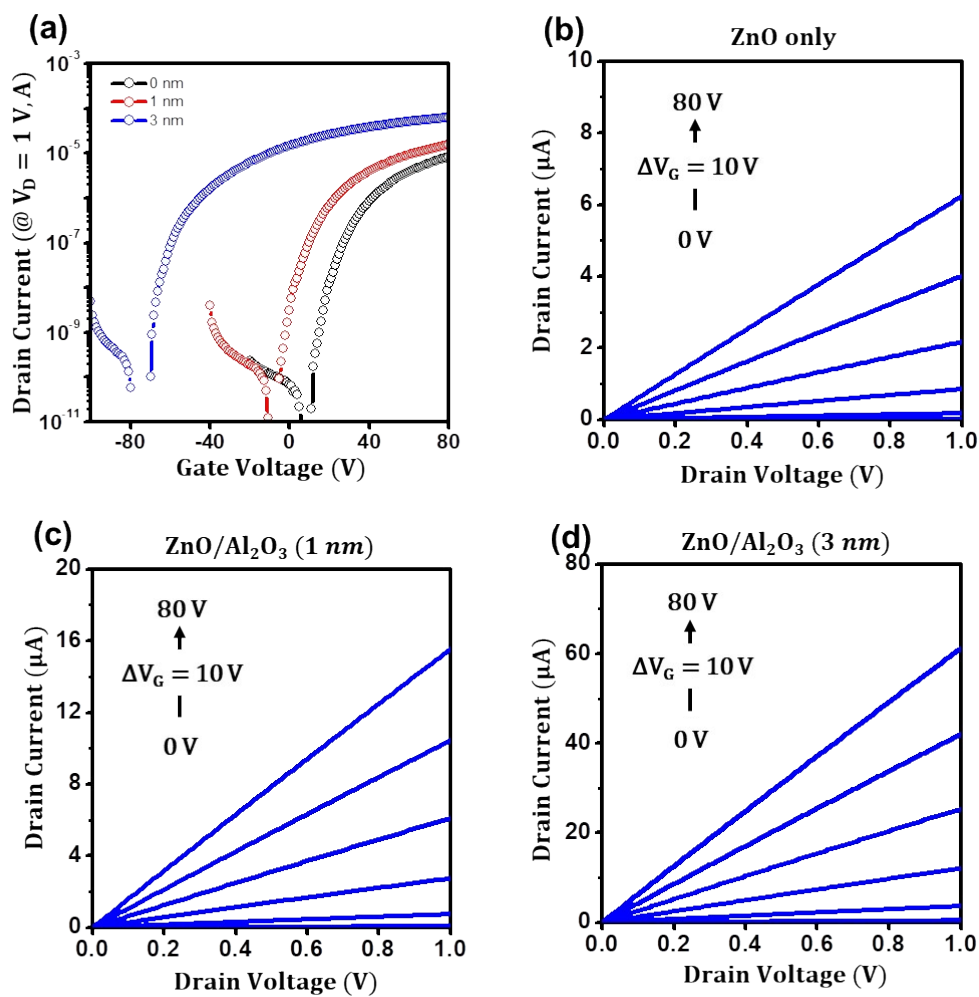

**Figure. S2.** (a) Transfer characteristic of the pure and doped ZnO TFTs. (b,c,d) Output characteristics of ZnO TFTs with and without the top Al<sub>2</sub>O<sub>3</sub> layer.

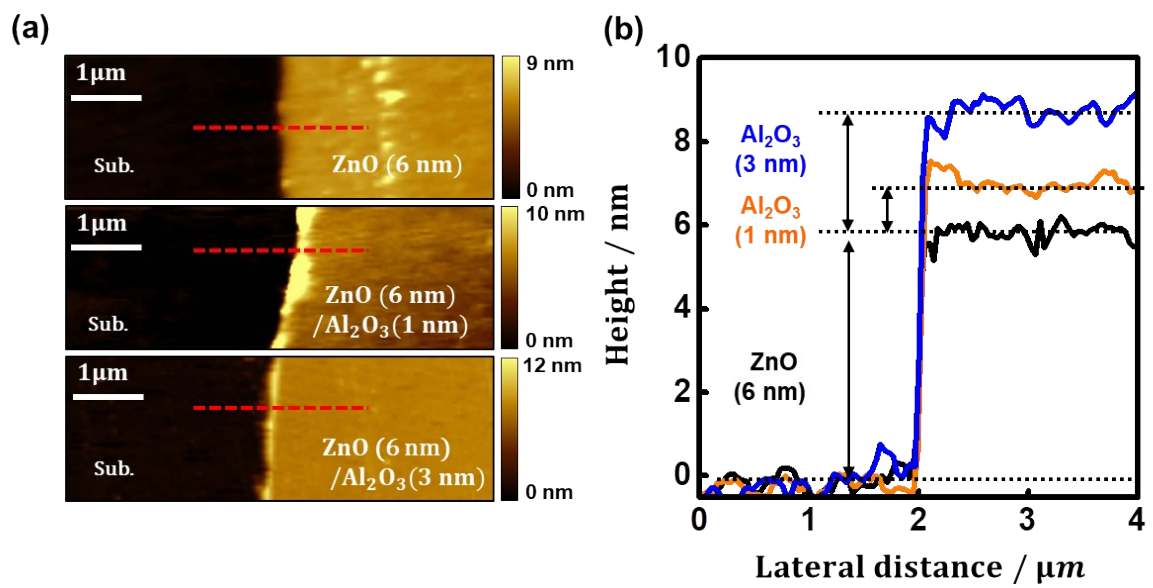

**Figure. S3.** Thickness measurements for characterization of the top Al<sub>2</sub>O<sub>3</sub> layer with an atomic force microscope. (a) AFM images (scan size : 6×2 μm), (b) Thickness profiles of the films.

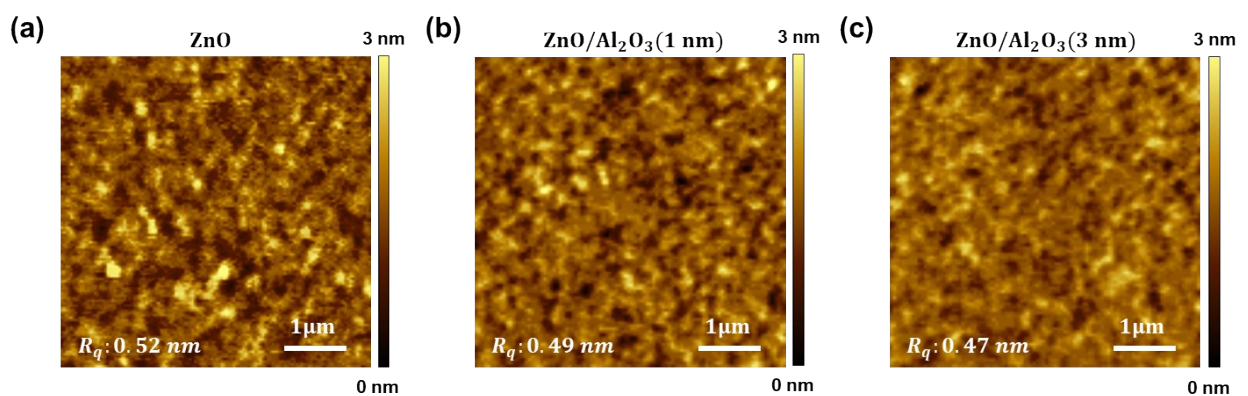

**Figure. S4.** Surface morphology of (a) pure ZnO, (b) 1nm-thin Al<sub>2</sub>O<sub>3</sub>-coated ZnO, and (c) 3 nm-thin Al<sub>2</sub>O<sub>3</sub>-coated ZnO film, respectively.

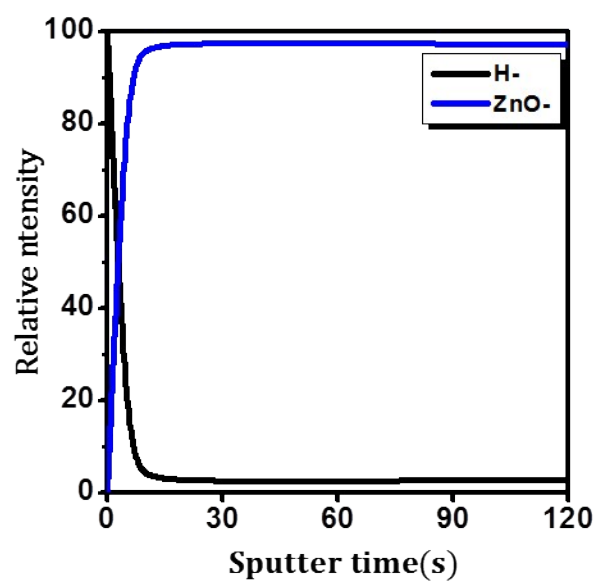

**Figure S5.** The SIMS depth profiling of the pure ZnO film.

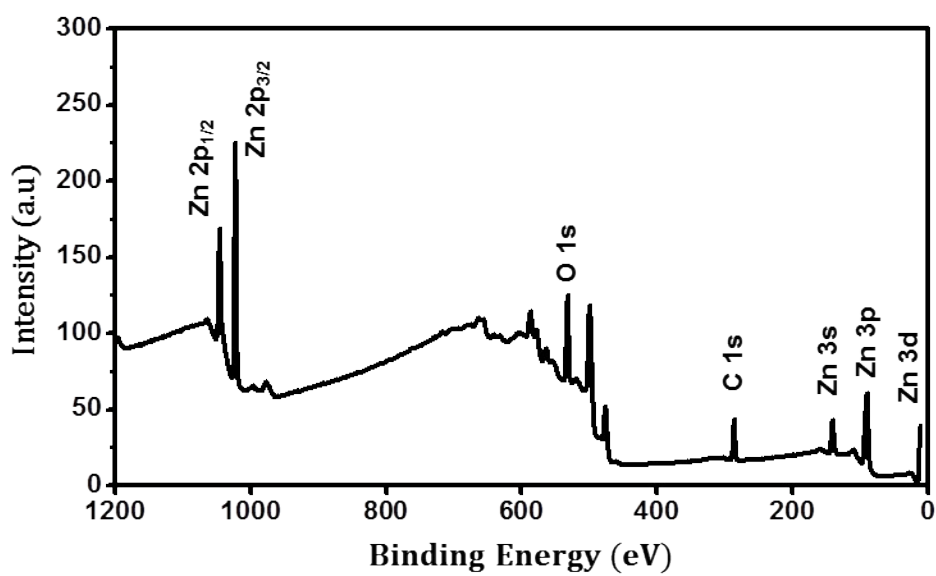

**Figure S6.** XPS survey spectrum of the ZnO film.

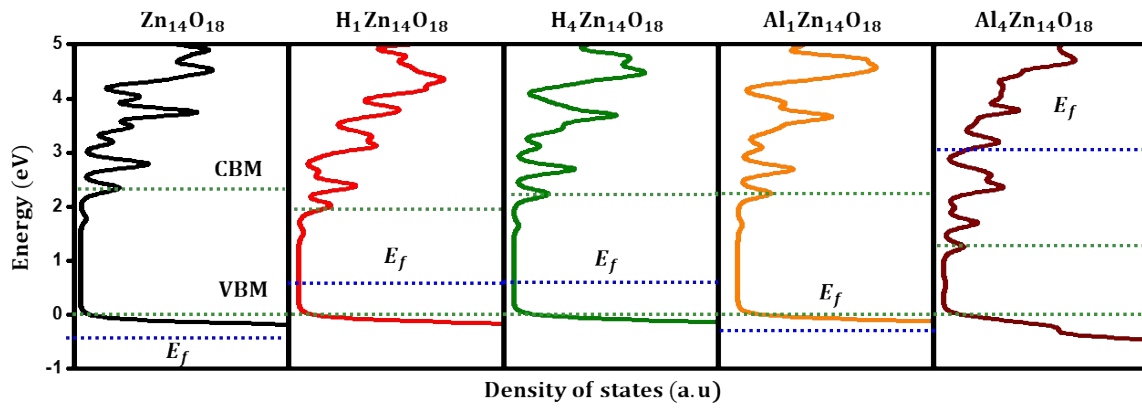

**Figure. S7.** DFT calculations of the ZnO films doped with either aluminum or hydrogen ions only
